# Supplementary material for: A highly efficient three-phase single drop microextraction technique for sample preconcentration
Source: Royal Society of Chemistry journal article supplement (doi:10.1039/c4an02324b), 2015-01-01
Supplement: c4an02324b3.pdf [file c4an02324b3.pdf]

1  
2  
3  
4  
5  
6  
7  
8  
9  
10  
11  
12  
13  
14  
15  
16

## Supporting Information

### Highly Efficient Three-Phase Single Drop Microextraction Technique for Sample Preconcentration

Sharmin Jahan<sup>1a</sup>, Haiyang Xie<sup>1a</sup>, Ran Zhong<sup>a</sup>, Jian Yan<sup>b</sup>, Hua Xiao<sup>a</sup>, Liuyin Fan<sup>a</sup>, and Chengxi Cao<sup>a\*</sup>

<sup>a</sup>Laboratory of Analytical Biochemistry and Bio-separation, State Key Laboratory of Microbial Metabolism, School of Life Science and Biotechnology, Shanghai Jiao Tong University, Shanghai, 200240, China

<sup>b</sup>Institute of Refrigeration and Cryogenics, School of Mechanical Engineering, Shanghai Jiao Tong University, Shanghai 200240, China

#### Table of contents

|    |                                                                                                       |    |
|----|-------------------------------------------------------------------------------------------------------|----|
| 1. | Identification of analyst in HPLC/Q-TOF-MS                                                            | S2 |
| 2. | LC/MS Analysis                                                                                        | S3 |
| 3. | Schematic illustration of microextraction procedure                                                   | S4 |
| 4. | Stability of organic-aqueous droplet                                                                  | S5 |
| 5. | Influence of organic solvent on extraction                                                            | S5 |
| 6. | Influence of pH                                                                                       | S6 |
| 7. | Effect of volume of acceptor phase, agitation speed, temperature and salt concentration on extraction | S7 |
| 8. | Relative recovery studies and Accuracy validation                                                     | S8 |
| 9. | Comparative experiment of river water and human serum                                                 | S8 |

17 **Experimental**

18 **1. Identification of analyt in HPLC/Q-TOF-MS:** Five statins were confirmed by their retention time  
19 and the identification of precursor ions and were quantified on the basis of the peak area using the  
20 quantitative ions.

---

**Supplementary Table S2. Retention times and Precursor ions of five statins**

---

| Analyte       | t <sub>R</sub> (min) | Precursor ion (m/z)           | Quantitative ion (m/z) |
|---------------|----------------------|-------------------------------|------------------------|
| Lovastatin    | 13.482               | [M+H <sup>+</sup> ]: 404.2563 | 404.2563               |
| Simvastatin   | 15.229               | [M+H <sup>+</sup> ]: 418.2719 | 418.2719               |
| Fluvastatin   | 11.131               | [M+H <sup>+</sup> ]: 412.1919 | 412.1919               |
| Atrorvastatin | 10.494               | [M+H <sup>+</sup> ]: 559.2603 | 559.2603               |
| Mevastatin    | 12.171               | [M+H <sup>+</sup> ]: 391.2479 | 391.2479               |

---

21

22

23

24 **2. LC/MS Analysis**

25 The microextraction optimizations were carried out using an Agilent model 1290 Ultra Performance LC  
26 coupled to an Agilent model 6230 accurate mass time-of-flight (TOF) MS (Agilent Technologies, Santa  
27 Clara, CA), equipped with an Agilent Jet Stream (AJS) electrospray ionization (ESI) source system. The  
28 liquid chromatography was equipped with a binary pump, on-line degasser, thermostatic dual 54-well  
29 plate autosampler, a thermostatic column compartment and a Zorbax XDB C18 reverse phase column  
30 (4.6x150 mm, 5  $\mu$ m, particle size, Agilent Technologies, Santa Clara, CA) temperature-controlled at 30  $^{\circ}$ C.  
31 The mobile phase consisted of A (0.1% v/v ammonium formate in water) and B (0.1% v/v ammonium  
32 formate in acetonitrile). The gradient conditions of the mobile phase were as follows: 0 min, 60% B; 10  
33 min, 100% B; 16 min, 100% B; 16.10 min, 60% B; and 20 min, 60% B. The flow rate of the mobile phase  
34 was 0.2 mL/min, and the injection volume was 10  $\mu$ L. The mass spectrometer was operated in the positive  
35 ion mode with the following parameters: capillary voltage, 4000 V; the skimmer voltage, 65 V; nozzle  
36 voltage, 800 V; fragmentor voltage, 135 V. Nitrogen was used as the drying (8 L/min, 325  $^{\circ}$ C), sheath (11  
37 L/min, 350  $^{\circ}$ C) and nebulizer gas (35 psi). Data was saved in centroid mode using Agilent Mass Hunter  
38 Workstation Data Acquisition Software (revision B.04). Normalized data was generated by using  
39 calibration curves.

40

41 **3. Supplementary Figure S1.** Schematic illustration of liquid-liquid compound droplet microextraction  
42 (A) acceptor phase and organic solvent were withdrawn into the microsyringe sequentially; (B) the  
43 capillary was fixed with coupling device; (C) the microsyringe plunger was slowly depressed to initialize  
44 a compound drop at the tip of the capillary; (D) at specific time interval, the acceptor solvent was picked  
45 up into the microsyringe by pulling the syringe plunger; (E) immediately, it was inflated with acceptor  
46 phase and repeated the steps (D) and (E) at given time interval up to certain period. From step (A) to (C)  
47 were same for static and iterative droplet formation mode, and (D) and (E) were additional step for the  
48 iterative mode.  
49

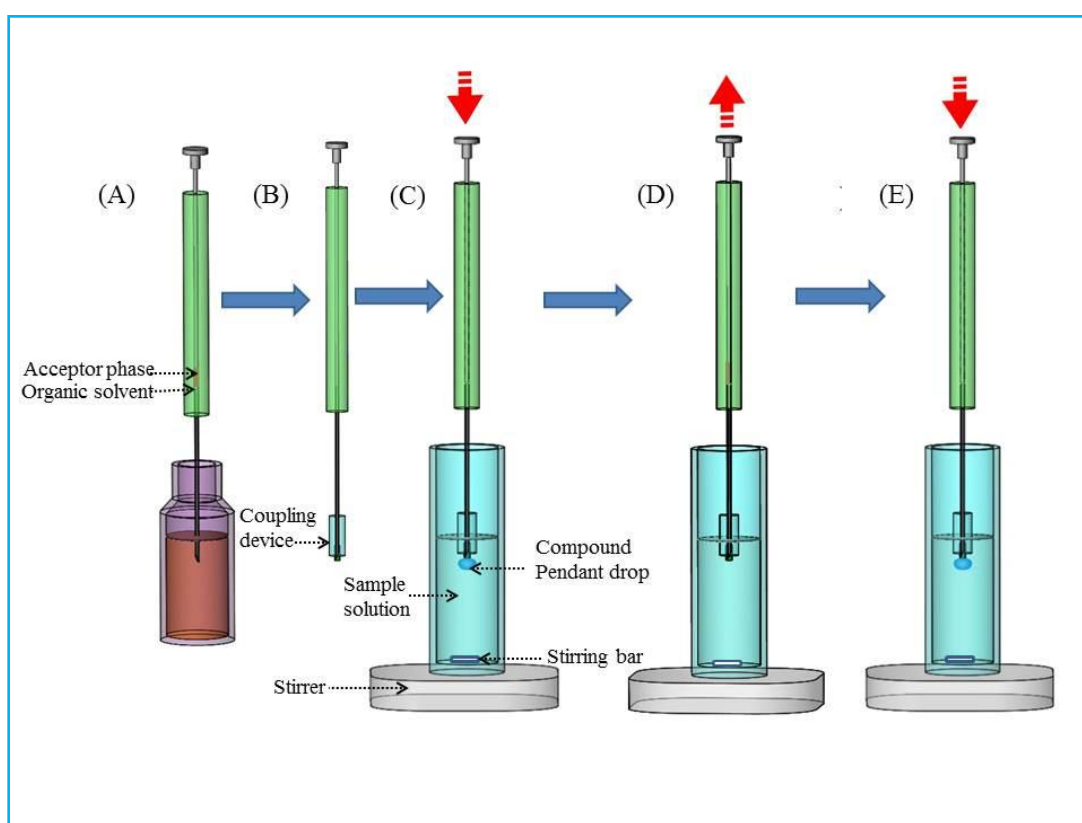

50

51

52 **Result and discussion**

53 **4. Supplementary Figure S2. Stability of organic-aqueous droplet**

54 Organic-aqueous droplet is a complex fluid system in which drop stability is influenced by its volume,  
55 shape, surface and interface properties. The relation between the shape of droplet and stability were very  
56 well illustrated in previous literatures, and for the sake of simplicity, we just investigated the influence of  
57 organic solvents (octanol, toluene, chlorobenzene), volume of acceptor phase (0.2-1.6  $\mu\text{L}$ ) and stirring  
58 rate (200-1600 rpm) on the stability of droplet.

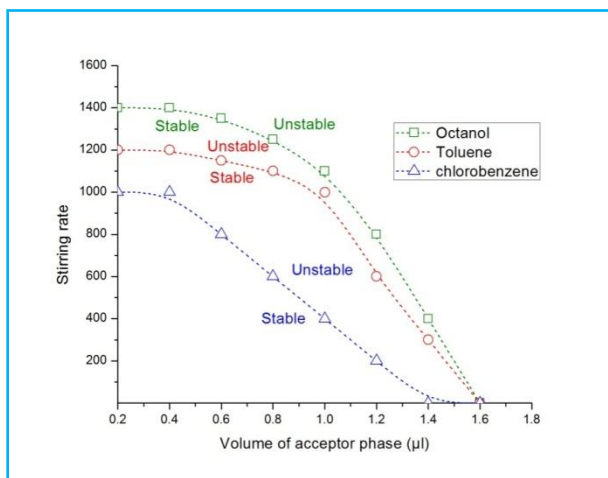

59

60

61 **5. Supplementary Figure S3. Influence of organic solvent on extraction.** Experimental conditions: 5 ml  
62 sample solution (5% NaCl in 5 mM HCl) containing 100 ng L<sup>-1</sup> of each statin, 1  $\mu\text{L}$  acceptor phase, 0.2  
63  $\mu\text{L}$  organic filter phase, 10 minute, 1000 rpm and 25 °C (n=6 ).

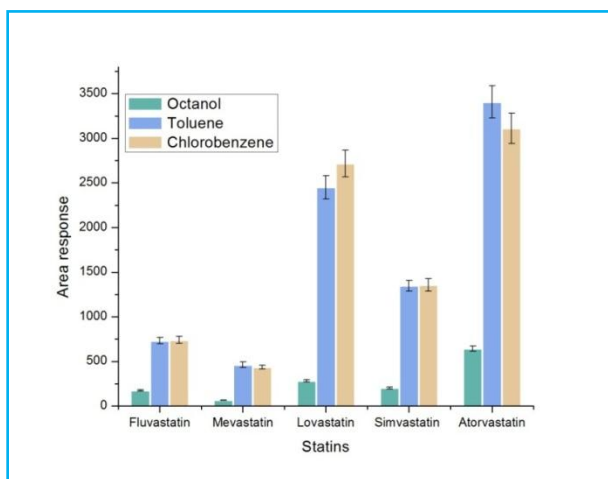

64

65

66 **6. Supplementary Figure S4.** Influence of pH of acceptor phase on extraction. Experimental conditions:  
67 5 ml donor phase (5 mM HCl solution) containing 100 ng L<sup>-1</sup> of each statin, 1 μL acceptor phase, 0.2 μL  
68 organic filter phase (toluene), 10 minute, 1000 rpm and 25 °C (n=6, RSD < 6 ).

69  
70

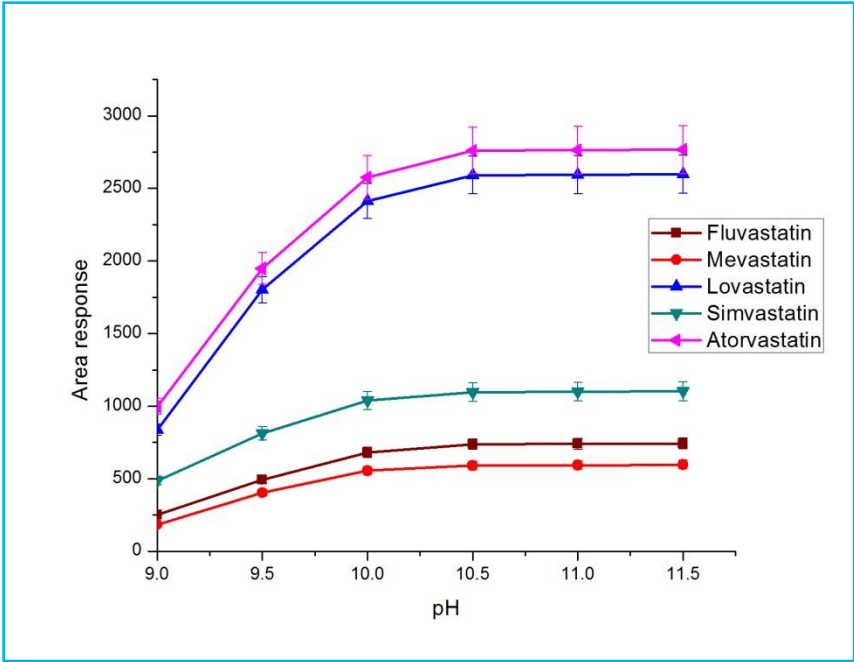

71  
72

73 **7. Supplementary Figure S5. (A) Effect of volume of acceptor phase:** Extraction efficiency was  
 74 studied in the range of 0.2  $\mu\text{L}$  to 1.2  $\mu\text{L}$ . (B) **Influence of agitation speed:** Agitation speed was examined  
 75 over the range of 200 to 1000 rpm. It was observed that the peak area responses of five statins gradually  
 76 augmented by increasing the stirring rate from 200 to 600 rpm, and sharply risen from 600 to 1000 rpm.  
 77 (C) **Influence of temperature:** Investigation was done in the range of 20  $^{\circ}\text{C}$  to 50  $^{\circ}\text{C}$ . There was a little  
 78 improvement in area responses with high temperature. No significant enhancement was noticed in  
 79 response area above 40  $^{\circ}\text{C}$ . It was also observed that air bubbles were sometimes generated in the sample  
 80 solution at higher temperature (above 50  $^{\circ}\text{C}$ ), which had an adverse effect on the extraction. (D) **Effect of**  
 81 **salt concentration:** The salt effect was explored by adding NaCl to donor phase in range of 5 to 20%  
 82 (w/v). The addition of 5% and 10% salt exhibited a slight improvement of area response and the increased  
 83 density of NaCl showed additional buoyancy, and the droplet was more vulnerable to breakup at the  
 84 concentration of 10%. [Experimental conditions: 5 ml sample solution (5 mM HCl) containing 100  $\text{ng L}^{-1}$   
 85 of each statin, acceptor phase (0.01 M liquid ammonia), 0.2  $\mu\text{L}$  organic filter phase (toluene), 10 minute  
 86 extraction time (n=6).]

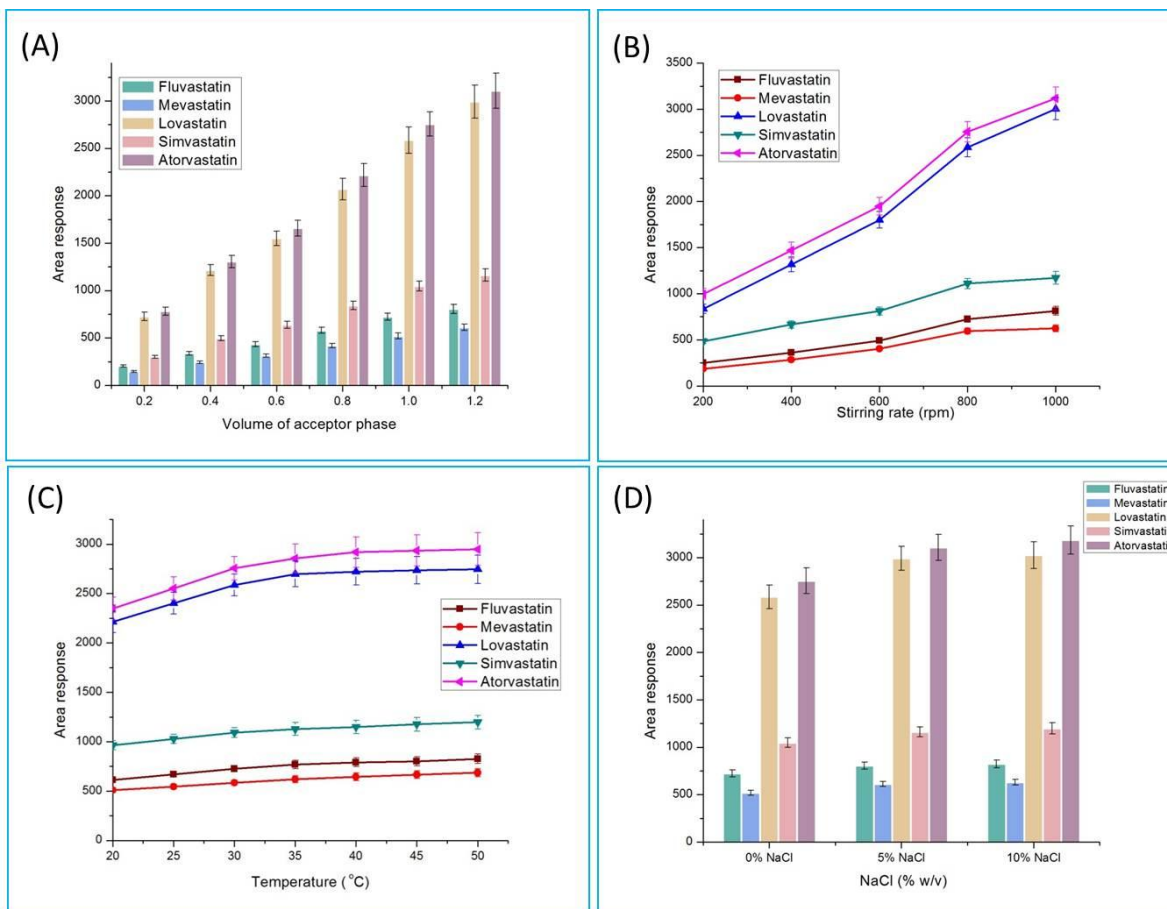

87

88

## 89 8. Relative recovery studies and Accuracy validation

90 Relative recoveries of the extraction were calculated as the ratio of the response after extraction from real  
91 samples and the ultra-pure water following the same condition. [W. Gao et al. *Talanta*, 83 (2011) 1673–  
92 1679]

$$93 \text{ Relative recovery} = (RA_x / RA_k) \times 100$$

94 The student's *t* test was also applied to the results demonstrating acceptable accuracy within the 95%  
95 confidence level according to the following equation for river water and serum separately.

$$96 t = \pm (\bar{x} - \mu) / (s / \sqrt{N})$$

97 Where, " $\bar{x}$ " is Mean of experimental value, " $\mu$ " is Known value, "*s*" is Standard deviation and "*N*" is  
98 Number of measurements.

99

100 **9. Supplementary Figure S6.** Chromatography spectrum of river water (A) and human serum sample (B)  
101 spiked with 100 ng L<sup>-1</sup> of each statin with Iterative mode of three-phase SDME. Peak identification: (1)  
102 Atorvastatin, (2) Fluvastatin, (3) Mevastatin, (4) Lovastatin, (5) Simvastatin. Experimental conditions: 5  
103 ml sample solution (5% NaCl in 5 mM M HCl solution), 1  $\mu$ L acceptor phase (0.01 M liquid ammonia),  
104 0.2  $\mu$ L organic filter phase (toluene), 4 minute (1 min interval in iterative microextraction method), 1000  
105 rpm and 40 °C.

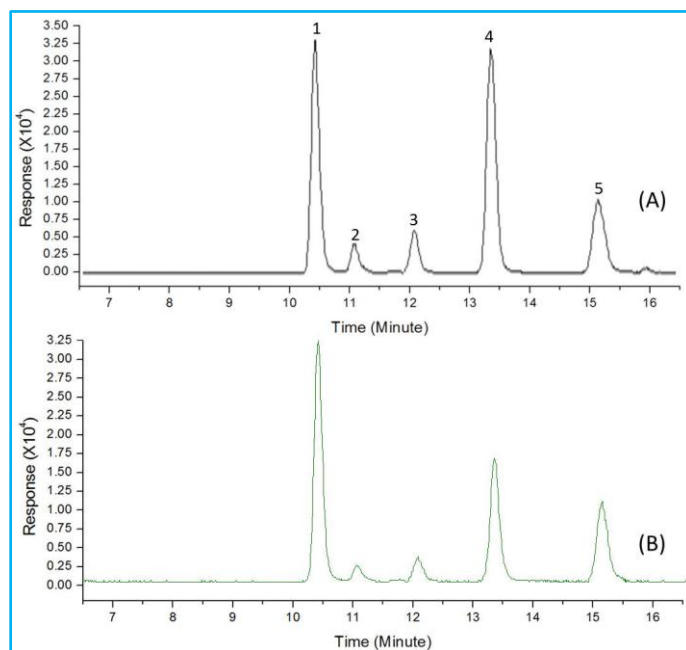

106
